# Supplementary material
Source: HighWire-hosted journal article supplement (https://bmjopenquality.bmj.com/highwire/filestream/143247/field_highwire_adjunct_files/0/bmjoq-2021-001607supp001_data_supplement.pdf)
Supplement: bmjoq-2021-001607supp001_data_supplement.pdf [file bmjoq-2021-001607supp001_data_supplement.pdf]

## APPENDIX A

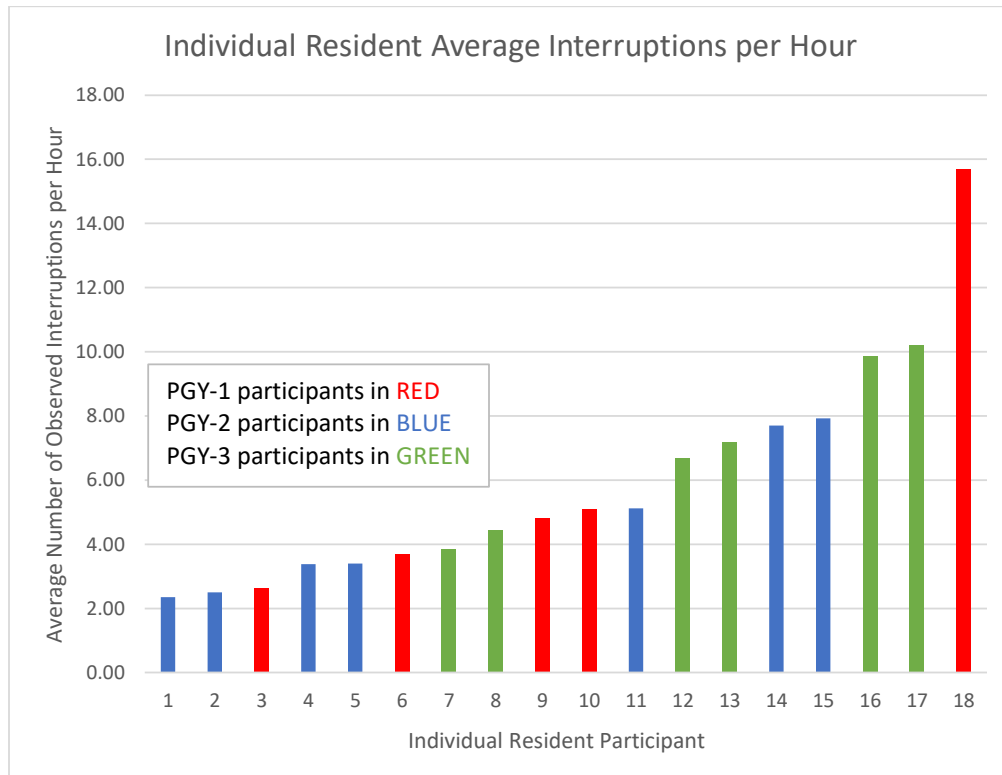

Individual resident participants are listed in order of average number of observed interruptions. Post-Graduate Year (PGY) of each participant is noted by color as above.

## APPENDIX B

## Frequency of Action before Interruption and Average Time to Return to Original Action

| Category           | Action before Interruption                 | Frequency | Average Time<br>(in min.) to<br>Return to<br>Primary Task | SD    | MIN  | MAX   |
|--------------------|--------------------------------------------|-----------|-----------------------------------------------------------|-------|------|-------|
| Computer - Writing | Patient Note                               | 84        | 1.79                                                      | 5.90  | 0.00 | 36.67 |
| Computer - Read    | EPIC Chart (Notes, Data, Labs,<br>Imaging) | 67        | 1.51                                                      | 4.02  | 0.00 | 17.62 |
| Talking/Rounding   | Talking with medical team/staff            | 66        | 0.99                                                      | 2.37  | 0.00 | 13.82 |
| Computer - Writing | Orders                                     | 16        | 1.17                                                      | 3.07  | 0.00 | 12.25 |
| Talking/Rounding   | Talking with Pt/Family                     | 12        | 5.01                                                      | 14.94 | 0.00 | 52.20 |
| Paper - Writing    | Other                                      | 10        | 4.98                                                      | 8.41  | 0.00 | 24.75 |
| Paper - Writing    | Chart, Data, Labs                          | 9         | 0.59                                                      | 1.37  | 0.00 | 4.07  |
| Computer - Writing | Other                                      | 7         | 0.91                                                      | 1.45  | 0.00 | 3.37  |
| Paper - Read       | Chart, Data, Labs, Imaging                 | 4         | 5.98                                                      | 11.88 | 0.00 | 23.80 |
| Walking/Moving     | Walking, No Talking                        | 3         | 0.73                                                      | 0.89  | 0.00 | 1.72  |
| Walking/Moving     | Talking medical                            | 3         | 4.88                                                      | 8.33  | 0.00 | 14.50 |
| Computer - Read    | Med Reference/Literature Search            | 2         | 0.00                                                      | 0.00  | 0.00 | 0.00  |
| Paper - Read       | Other                                      | 2         | 5.05                                                      | 2.83  | 3.05 | 7.05  |
| Personal           | Email                                      | 2         | 0.00                                                      | 0.00  | 0.00 | 0.00  |
| Phone              | Patient Related                            | 2         | 0.00                                                      | 0.00  | 0.00 | 0.00  |
| Personal           | Smartphone                                 | 1         | 0.88                                                      | N/A   | 0.88 | 0.88  |
| Computer - Read    | Email                                      | 1         | 0.50                                                      | N/A   | 0.50 | 0.50  |
| Computer - Writing | Email                                      | 1         | 0.00                                                      | N/A   | 0.00 | 0.00  |
| Patient Activity   | Examining Patient                          | 1         | 0.00                                                      | N/A   | 0.00 | 0.00  |
| Personal           | Socializing                                | 1         | 0.63                                                      | N/A   | 0.63 | 0.63  |
| Computer - Writing | Patient Note                               | 6         |                                                           |       |      |       |
| Paper - Writing    | Chart, Data, Labs                          | 4         |                                                           |       |      |       |
| Personal           | Eating                                     | 3         |                                                           |       |      |       |
| Talking/Rounding   | Talking with medical team/staff            | 3         |                                                           |       |      |       |
| Walking/Moving     | Walking, No Talking                        | 3         |                                                           |       |      |       |
| Computer - Read    | Other                                      | 2         |                                                           |       |      |       |
| Patient Activity   | Examining Patient                          | 2         |                                                           |       |      |       |
| Phone              | Patient Related                            | 2         |                                                           |       |      |       |
| Walking/Moving     | Walking/Talking medical                    | 2         |                                                           |       |      |       |
| Computer - Read    | EPIC Chart (Notes, Data, Labs,<br>Imaging) | 1         |                                                           |       |      |       |
| Computer - Writing | Orders                                     | 1         |                                                           |       |      |       |
| Computer - Writing | Other                                      | 1         |                                                           |       |      |       |
| Pager              | Sending page/text                          | 1         |                                                           |       |      |       |
| Paper - Read       | Chart, Data, Labs, Imaging                 | 1         |                                                           |       |      |       |
| Paper - Writing    | Other                                      | 1         |                                                           |       |      |       |
| Personal           | Socializing                                | 1         |                                                           |       |      |       |
| Personal           | Smartphone                                 | 1         |                                                           |       |      |       |

Participants didn't return to these primary tasks after they were observed to be interrupted
